# Supplementary material for: Exosome-Mediated Differentiation of Mouse Embryonic Fibroblasts and Exocrine Cells into β-Like Cells and the Identification of Key miRNAs for Differentiation
Source: PubMed Central journal article supplement (PMC7695333; doi:10.3390/biomedicines8110485), 2020-11-09
Supplement: biomedicines-08-00485-s001.pdf [file biomedicines-08-00485-s001.pdf]

## Supplementary Information

# Exosome-mediated differentiation of mouse embryonic fibroblasts and exocrine cells into $\beta$ -like cells and the identification of key miRNAs for differentiation

Paulami Mandal<sup>1</sup>, Debojyoti De<sup>2</sup>, Im Dong Uk<sup>3</sup>, Sung Hee Um<sup>3</sup>, and Kyeong Kyu Kim<sup>1\*</sup>

<sup>1</sup>Department of Precision Medicine, Sungkyunkwan University School of Medicine, Suwon 16419, Korea; mandalpaulami28@gmail.com

<sup>2</sup>Department of Biotechnology, National Institute of Technology Durgapur, 713209, India; debojyoti.de@bt.nitdgp.ac.in

<sup>3</sup>Department of Molecular Cell Biology, Sungkyunkwan University School of Medicine, Suwon 16419, Korea; Ldw4545@gmail.com, shum@skku.edu

**\*Corresponding author: Kyeong Kyu Kim**

**email: kyeongkyu@skku.edu; Tel.: (+82) 31 299 6136**

## Supplementary Tables

**Supplementary Table 1: List of primers used in qRT-PCR analysis.**

| Gene Name      | Forward Primer (5'-3')   | Reverse Primer (5'-3') |
|----------------|--------------------------|------------------------|
| Ngn3           | CAGTCACCCACTTCTGCTTC     | GAGTCGGGAGAACTAGGATG   |
| Nkx6.1         | CTTCTGGCCCGGAGTGATG      | GGGTCTGGTGTGTTTTCTCTTC |
| Pdx1           | CTTAACCTAGGCGTCGCACAA    | GAAGCTCAGGGCTGTTTTTCC  |
| Insulin-1      | GACCAGCTATAATCAGAGACCATC | GTAGGAAGTGCACCAACAGG   |
| Insulin-2      | GGCTTCTTCTACACCCCAT      | CCAAGGTCTGAAGGTCACCT   |
| Glucagon       | AGGGACCTTTACCAGTGATGT    | AATGGCGACTTCTTCTGGGAA  |
| Elastase1      | CGTGGTTGCAGGCTATGACAT    | TTGTTAGCCAGGATGGTT     |
| Cytokeratin 19 | CCTCCCGAGATTACAACCACT    | GGCGAGCATTGTCAATCTGT   |
| $\beta$ -actin | GGCACCACACCTTCTACAATG    | CCATGCCTGTGATTTGCAGTA  |

**Supplementary Table 2. List of the antibodies used in the study.**

| Antibody       | Dilution used | Company                   | Catalog number | Purpose |
|----------------|---------------|---------------------------|----------------|---------|
| Pdx1           | 1:100         | R&D systems               | AF2419         | IF      |
| Ngn3           | 1:100         | Millipore                 | AB5684         | IF      |
| C-peptide      | 1:200         | Cell Signaling Technology | 4593S          | IF      |
| $\beta$ -actin | 1:1000        | Cell Signaling Technology | 4967S          | WB      |
| CD9            | 1:1000        | Abcam                     | ab92726        | WB      |
| TSG101         | 1:1000        | Abcam                     | ab83           | WB      |
| Alix           | 1:1000        | Abcam                     | ab117600       | WB      |
| Calnexin       | 1:1000        | Abcam                     | ab22595        | WB      |

**Supplementary Table 3: Comparison of pancreatic markers (Pdx1 and Insulin-2) and MEF marker (Fsp1) expression (qRT-based) during the various differentiation stages in the tested conditions**

| Marker                                                        | Condition              | Stage 1<br>(MEF to PEC)<br>(expression fold change) | Stage 2<br>(PEC to PPLC)<br>(expression fold change) | Stage 3<br>(PPLC to BLC)<br>(expression fold change) |
|---------------------------------------------------------------|------------------------|-----------------------------------------------------|------------------------------------------------------|------------------------------------------------------|
| <b>Pdx1</b><br>(upregulation compared to starting cells)      | Small molecule         | 2.0                                                 | 1.9                                                  | 2.3                                                  |
|                                                               | Exosome                | 3.9                                                 | 3.9                                                  | 4.1                                                  |
|                                                               | Exosome+small molecule | 5.9                                                 | 6.4                                                  | 7.1                                                  |
|                                                               | *miRNA+small molecule  | 5.2                                                 | 4.8                                                  | 5.6                                                  |
| <b>Fsp1</b><br>(downregulation compared to starting cells)    | Small molecule         | 0.7                                                 | 0.7                                                  | 0.6                                                  |
|                                                               | Exosome                | 0.5                                                 | 0.45                                                 | 0.35                                                 |
|                                                               | Exosome+small molecule | 0.45                                                | 0.3                                                  | 0.38                                                 |
|                                                               | *miRNA+small molecule  | Not detected                                        | Not detected                                         | Not detected                                         |
| <b>Insulin-2</b><br>(upregulation compared to starting cells) | Small molecule         | Not detected                                        | Not detected                                         | 3.6                                                  |
|                                                               | Exosome                | Not detected                                        | Not detected                                         | 5.2                                                  |
|                                                               | Exosome+small molecule | Not detected                                        | Not detected                                         | 10.0                                                 |
|                                                               | *miRNA+small molecule  | Not detected                                        | Not detected                                         | 8.4                                                  |

\*miRNA = miR-127+709 combination 3

**Supplementary Table 4. List of miRNAs with their respective fold changes (MIN6 derived exosome versus MIN6 cells) identified during our miRNA-seq study.**

| Mature ID       | Exosome/Cell.fc |
|-----------------|-----------------|
| mmu-let-7a-1-3p | -3.807821       |
| mmu-let-7a-5p   | -9.116792       |
| mmu-let-7b-3p   | -10.570485      |
| mmu-let-7b-5p   | -3.527494       |
| mmu-let-7c-2-3p | -3.807912       |
| mmu-let-7c-5p   | -6.228514       |
| mmu-let-7d-3p   | -17.191155      |
| mmu-let-7d-5p   | -14.472401      |
| mmu-let-7e-5p   | -8.589144       |
| mmu-let-7f-5p   | -15.456174      |
| mmu-let-7g-5p   | -17.265257      |

|                  |            |
|------------------|------------|
| mmu-let-7i-5p    | -12.551729 |
| mmu-miR-106b-3p  | -8.050482  |
| mmu-miR-10b-5p   | 40.133529  |
| mmu-miR-1187     | 166.915824 |
| mmu-miR-1192     | 19.580919  |
| mmu-miR-1195     | 259.496784 |
| mmu-miR-122-5p   | 80.326061  |
| mmu-miR-125a-5p  | -13.613864 |
| mmu-miR-125b-5p  | -3.713809  |
| mmu-miR-126a-3p  | 10.446557  |
| mmu-miR-126a-5p  | 67.819520  |
| mmu-miR-127-3p   | 9.042725   |
| mmu-miR-127-5p   | 104.129920 |
| mmu-miR-128-3p   | -16.518765 |
| mmu-miR-129-1-3p | -10.913033 |
| mmu-miR-129-2-3p | -26.433096 |
| mmu-miR-129-5p   | -5.983911  |
| mmu-miR-1306-5p  | -4.406894  |
| mmu-miR-130a-3p  | -4.330568  |
| mmu-miR-130b-3p  | -3.431735  |
| mmu-miR-130b-5p  | -22.697251 |
| mmu-miR-134-5p   | 24.086596  |
| mmu-miR-139-5p   | 14.659340  |
| mmu-miR-143-3p   | 21.302332  |
| mmu-miR-145a-5p  | 198.195520 |
| mmu-miR-146b-5p  | -4.292185  |
| mmu-miR-149-5p   | -5.878755  |
| mmu-miR-150-5p   | 168.679944 |
| mmu-miR-15b-3p   | -24.006716 |
| mmu-miR-15b-5p   | -8.999508  |
| mmu-miR-183-5p   | -17.122902 |
| mmu-miR-1839-3p  | -4.184237  |
| mmu-miR-1839-5p  | -7.860892  |
| mmu-miR-186-5p   | -3.015661  |
| mmu-miR-187-3p   | -7.720757  |
| mmu-miR-1895     | 77.539874  |
| mmu-miR-1934-3p  | 26.738363  |
| mmu-miR-1943-5p  | 10.223467  |
| mmu-miR-1946a    | 7.675338   |
| mmu-miR-1946b    | 9.877801   |
| mmu-miR-1983     | -10.353028 |
| mmu-miR-199a-3p  | 60.663636  |
| mmu-miR-199b-3p  | 60.654103  |
| mmu-miR-19b-3p   | 178.961694 |

|                     |            |
|---------------------|------------|
| mmu-miR-200b-3p     | -37.577451 |
| mmu-miR-200b-5p     | -8.379391  |
| mmu-miR-200c-3p     | -25.659959 |
| mmu-miR-21a-5p      | -5.893460  |
| mmu-miR-23a-3p      | -3.245082  |
| mmu-miR-23a-5p      | 3.720200   |
| mmu-miR-23b-3p      | -18.144918 |
| mmu-miR-25-3p       | -12.006030 |
| mmu-miR-26a-5p      | -4.261298  |
| mmu-miR-26b-5p      | -8.404236  |
| mmu-miR-28a-3p      | -16.334221 |
| mmu-miR-28a-5p      | -10.068425 |
| mmu-miR-28c         | -10.074902 |
| mmu-miR-29a-3p      | -12.915652 |
| mmu-miR-29b-3p      | -13.628933 |
| mmu-miR-29c-3p      | -23.708318 |
| mmu-miR-300-3p      | 4.861530   |
| mmu-miR-3068-3p     | 11.984002  |
| mmu-miR-3082-5p     | 45.686787  |
| mmu-miR-30a-3p      | -14.142488 |
| mmu-miR-30c-2-3p    | -5.713365  |
| mmu-miR-30c-5p      | -11.296544 |
| mmu-miR-30d-5p      | -5.357540  |
| mmu-miR-30e-3p      | -17.931555 |
| mmu-miR-3102-3p     | -20.683334 |
| mmu-miR-3102-3p.23p | -6.690369  |
| mmu-miR-32-3p       | -17.335852 |
| mmu-miR-320-3p      | 3.991324   |
| mmu-miR-323-3p      | 9.155810   |
| mmu-miR-324-3p      | -3.296454  |
| mmu-miR-324-5p      | -5.000177  |
| mmu-miR-328-3p      | -7.100876  |
| mmu-miR-328-5p      | 25.980339  |
| mmu-miR-337-5p      | 5.995661   |
| mmu-miR-339-5p      | 6.252500   |
| mmu-miR-340-5p      | -23.396447 |
| mmu-miR-341-3p      | 42.271474  |
| mmu-miR-342-3p      | -4.876783  |
| mmu-miR-344d-3p     | -9.641260  |
| mmu-miR-344g-3p     | 6.952215   |
| mmu-miR-345-3p      | -4.277142  |
| mmu-miR-345-5p      | -28.282165 |
| mmu-miR-3470a       | 355.374470 |
| mmu-miR-3470b       | 547.665913 |

|                 |            |
|-----------------|------------|
| mmu-miR-3473a   | 256.265604 |
| mmu-miR-3473b   | 92.866008  |
| mmu-miR-3473d   | 3.092976   |
| mmu-miR-3473e   | 54.761252  |
| mmu-miR-3473f   | 37.385475  |
| mmu-miR-361-3p  | -13.371978 |
| mmu-miR-374b-5p | -26.222869 |
| mmu-miR-374c-5p | -26.507382 |
| mmu-miR-375-3p  | -3.731548  |
| mmu-miR-375-5p  | -9.721454  |
| mmu-miR-376b-3p | 8.313532   |
| mmu-miR-378a-3p | 6.255373   |
| mmu-miR-378a-5p | -6.667246  |
| mmu-miR-378b    | 4.429897   |
| mmu-miR-378c    | 3.901886   |
| mmu-miR-378d    | 3.823223   |
| mmu-miR-379-5p  | 4.565606   |
| mmu-miR-381-3p  | 23.917825  |
| mmu-miR-382-3p  | 11.887733  |
| mmu-miR-382-5p  | 6.576152   |
| mmu-miR-384-3p  | -48.917342 |
| mmu-miR-384-5p  | -28.401115 |
| mmu-miR-3960    | 9.506589   |
| mmu-miR-3963    | 23.214709  |
| mmu-miR-3968    | 7.335193   |
| mmu-miR-409-3p  | 8.735220   |
| mmu-miR-411-3p  | 3.992497   |
| mmu-miR-421-3p  | -7.590791  |
| mmu-miR-423-3p  | -4.619359  |
| mmu-miR-423-5p  | 3.789556   |
| mmu-miR-425-3p  | -4.443715  |
| mmu-miR-429-3p  | -10.439213 |
| mmu-miR-434-3p  | 33.493020  |
| mmu-miR-455-3p  | -14.756366 |
| mmu-miR-465a-3p | 6.568159   |
| mmu-miR-465a-5p | 13.014475  |
| mmu-miR-465b-3p | 6.568175   |
| mmu-miR-465c-3p | 6.567922   |
| mmu-miR-466c-5p | 9.622100   |
| mmu-miR-466f-3p | 28.142251  |
| mmu-miR-466g    | 27.847961  |
| mmu-miR-466h-3p | 36.489047  |
| mmu-miR-466i-3p | 25.019113  |
| mmu-miR-466i-5p | 333.000653 |

|                  |            |
|------------------|------------|
| mmu-miR-466m-3p  | 28.729906  |
| mmu-miR-467b-3p  | 51.993403  |
| mmu-miR-467f     | 17.702357  |
| mmu-miR-470-5p   | 38.575463  |
| mmu-miR-483-3p   | -18.550653 |
| mmu-miR-483-5p   | 3.715988   |
| mmu-miR-485-3p   | 4.261536   |
| mmu-miR-485-5p   | 22.053647  |
| mmu-miR-486a-5p  | 616.349384 |
| mmu-miR-486b-5p  | 616.499206 |
| mmu-miR-494-3p   | 33.379355  |
| mmu-miR-495-3p   | 9.182152   |
| mmu-miR-501-3p   | -5.544372  |
| mmu-miR-5100     | 17.896849  |
| mmu-miR-5114     | 36.382429  |
| mmu-miR-5128     | 33.905757  |
| mmu-miR-532-3p   | -4.630297  |
| mmu-miR-532-5p   | -6.477315  |
| mmu-miR-540-3p   | 11.424586  |
| mmu-miR-541-5p   | 4.936353   |
| mmu-miR-5615-3p  | 33.862266  |
| mmu-miR-574-5p   | 4.578137   |
| mmu-miR-664-3p   | -5.381095  |
| mmu-miR-667-3p   | 25.139104  |
| mmu-miR-669c-3p  | 59.973546  |
| mmu-miR-669f-3p  | 10.129424  |
| mmu-miR-669h-3p  | 18.611816  |
| mmu-miR-669p-3p  | 11.452058  |
| mmu-miR-671-5p   | 21.794305  |
| mmu-miR-673-5p   | 3.753058   |
| mmu-miR-674-5p   | -4.451334  |
| mmu-miR-676-3p   | -11.571867 |
| mmu-miR-6769b-5p | 9.313431   |
| mmu-miR-700-3p   | -4.115564  |
| mmu-miR-7033-5p  | 5.878816   |
| mmu-miR-706      | 92.986520  |
| mmu-miR-7070-5p  | 20.795715  |
| mmu-miR-708-5p   | -5.330836  |
| mmu-miR-709      | 97.283987  |
| mmu-miR-741-3p   | 8.882910   |
| mmu-miR-743a-3p  | 4.095869   |
| mmu-miR-744-5p   | -19.517893 |
| mmu-miR-7651-5p  | 49.183475  |
| mmu-miR-7667-5p  | 124.614839 |

|                 |            |
|-----------------|------------|
| mmu-miR-7668-3p | 96.455228  |
| mmu-miR-770-3p  | 84.832541  |
| mmu-miR-7a-1-3p | -10.662543 |
| mmu-miR-7a-2-3p | -10.126892 |
| mmu-miR-7a-5p   | -20.554652 |
| mmu-miR-7b-5p   | -17.306686 |
| mmu-miR-8094    | 91.196484  |
| mmu-miR-8101    | 12.250054  |
| mmu-miR-871-3p  | 4.678592   |
| mmu-miR-877-5p  | 3.306036   |
| mmu-miR-92a-3p  | 46.780288  |
| mmu-miR-93-3p   | -3.244881  |
| mmu-miR-93-5p   | -4.742321  |
| mmu-miR-98-3p   | -29.624332 |
| mmu-miR-98-5p   | -23.672377 |
| mmu-miR-99b-3p  | -3.299768  |
| mmu-miR-99b-5p  | -18.799197 |

**Supplementary Table 5. Top 20 upregulated miRNAs present in MIN6-derived exosomes and MIN6**

**parental cells.**

| MIN6-derived exosomes |             | MIN6-cells       |             |
|-----------------------|-------------|------------------|-------------|
| miRNA                 | Fold-change | miRNA            | Fold change |
| mmu-miR-486b-5p       | 616.499206  | mmu-miR-384-3p   | 48.917342   |
| mmu-miR-486a-5p       | 616.349384  | mmu-miR-200b-3p  | 37.577451   |
| mmu-miR-3470b         | 547.665913  | mmu-miR-98-3p    | 29.624332   |
| mmu-miR-3470a         | 355.374470  | mmu-miR-384-5p   | 28.401115   |
| mmu-miR-466i-5p       | 333.000653  | mmu-miR-345-5p   | 28.282165   |
| mmu-miR-1195          | 259.496784  | mmu-miR-374c-5p  | 26.507382   |
| mmu-miR-3473a         | 256.265604  | mmu-miR-129-2-3p | 26.433096   |
| mmu-miR-145a-5p       | 198.195520  | mmu-miR-374b-5p  | 26.222869   |
| mmu-miR-19b-3p        | 178.961694  | mmu-miR-200c-3p  | 25.659959   |
| mmu-miR-150-5p        | 168.679944  | mmu-miR-15b-3p   | 24.006716   |
| mmu-miR-1187          | 166.915824  | mmu-miR-29c-3p   | 23.708318   |
| mmu-miR-7667-5p       | 124.614839  | mmu-miR-98-5p    | 23.672377   |
| mmu-miR-127-5p        | 104.129920  | mmu-miR-340-5p   | 23.396447   |
| mmu-miR-709           | 97.283987   | mmu-miR-130b-5p  | 22.697251   |
| mmu-miR-7668-3p       | 96.455228   | mmu-miR-3102-3p  | 20.683334   |
| mmu-miR-706           | 92.986520   | mmu-miR-7a-5p    | 20.554652   |
| mmu-miR-3473b         | 92.866008   | mmu-miR-744-5p   | 19.517893   |
| mmu-miR-8094          | 91.196484   | mmu-miR-99b-5p   | 18.799197   |
| mmu-miR-770-3p        | 84.832541   | mmu-miR-483-3p   | 18.550653   |
| mmu-miR-122-5p        | 80.326061   | mmu-miR-23b-3p   | 18.144918   |

Note: Yellow highlighted miRNAs were used for validation experiments.



**Supplementary Table 6. miRNAs with almost equal representation in MIN6-derived exosomes and**

**MIN6 parental cells.**

| <b>Mature ID</b>     | <b>Exosome/Cell.fc</b> |
|----------------------|------------------------|
| mmu-miR-138-2-3p     | 1.064939               |
| mmu-miR-30e-5p       | -1.074367              |
| mmu-miR-3474         | 1.145588               |
| mmu-miR-411-5p       | 1.124023               |
| mmu-miR-669o-3p      | 1.088571               |
| mmu-miR-669a-3p      | 1.088504               |
| mmu-miR-185-5p       | 1.009138               |
| mmu-miR-3102-5p.2-5p | 1.032621               |
| mmu-miR-1224-3p      | -1.034021              |
| mmu-miR-344-3p       | 1.040514               |
| mmu-miR-690          | 1.046224               |
| mmu-miR-140-3p       | -1.067195              |
| mmu-miR-8114         | -1.149219              |
| mmu-miR-505-3p       | -1.242743              |
| mmu-miR-187-5p       | 1.321062               |
| mmu-miR-484          | 1.122070               |
| mmu-miR-3057-5p      | 1.147253               |
| mmu-miR-466q         | 1.140360               |
| mmu-miR-212-3p       | 1.147324               |
| mmu-miR-210-5p       | 1.246240               |
| mmu-miR-138-5p       | -1.411990              |
| mmu-miR-188-5p       | -1.456892              |
| mmu-miR-107-3p       | -1.234204              |
| mmu-miR-30a-5p       | 1.248001               |
| mmu-miR-128-1-5p     | 1.444100               |
| mmu-miR-124-3p       | 1.245127               |
| mmu-miR-219a-1-3p    | 1.412549               |
| mmu-miR-346-5p       | 1.312924               |
| mmu-miR-25-5p        | -1.291698              |
| mmu-miR-3064-5p      | 1.598874               |
| mmu-miR-3099-3p      | 1.295892               |
| mmu-miR-500-3p       | -1.413544              |
| mmu-miR-760-3p       | 1.351941               |
| mmu-miR-92b-3p       | -1.416943              |
| mmu-miR-5113         | 1.421578               |
| mmu-miR-5121         | 1.807264               |
| mmu-miR-6916-5p      | -1.960317              |
| mmu-miR-34a-5p       | -1.840036              |

**Supplementary Table 7: Marker expression (Pdx1) between the MIN6-derived exosome treated and miRNA combination transfected MEFs.**

| Marker | Condition                                             | Expression level<br>(fold-change compared to<br>medium control cells) | Expression level<br>(fold-change compared to miR-<br>127+709+19b combination 1-<br>transfected cells) |
|--------|-------------------------------------------------------|-----------------------------------------------------------------------|-------------------------------------------------------------------------------------------------------|
| Pdx1   | Exosome-100 µg                                        | 4.9                                                                   | 2.0                                                                                                   |
|        | miRNA (mir-127+709)-<br>200 nM<br>(combination 3)     | 3.7                                                                   | 1.6                                                                                                   |
|        | miRNA (mir-<br>127+709+19b)-200 nM<br>(combination 1) | 2.4                                                                   | 1.0                                                                                                   |

**Supplementary Table 8. Comparison of Pdx1 and Insulin markers in different studies compared to our study.**

| Conditions                    | Current study                                          | Current study                                        | Kim <i>et al.</i> study [1]                | Chandravanshi <i>et al.</i><br>study [2] |
|-------------------------------|--------------------------------------------------------|------------------------------------------------------|--------------------------------------------|------------------------------------------|
| <b>Starting cells</b>         | MEFs                                                   | MEFs                                                 | MEF (NOD mice)                             | MEFs                                     |
| <b>Method</b>                 | Small<br>molecule+<br>exosome;<br>monolayer<br>culture | Small<br>molecule+<br>miRNA;<br>monolayer<br>culture | iPSC+small molecule;<br>suspension culture | Small molecule;<br>suspension culture    |
| <b>Markers</b>                | <b>Fold change (expression in the final stage)</b>     |                                                      |                                            |                                          |
| <b>Pdx1<br/>(mRNA)</b>        | 8.1                                                    | 5.6                                                  | 10.0                                       | 5.5                                      |
| <b>Insulin-1+2<br/>(mRNA)</b> | 11.7                                                   | 8.4                                                  | 6.0                                        | 8.0*                                     |

\*Insulin-2 only

**Supplementary Table 9: Comparison of C-peptide release in different studies compared to our study.**

|                                            | <b>Our study</b>                                    | <b>Chandra <i>et al.</i> study [3]</b>                | <b>Zhu <i>et al.</i> study [4]</b>                             | <b>Lima <i>et al.</i> study [5]</b>                                                                                                                                  |
|--------------------------------------------|-----------------------------------------------------|-------------------------------------------------------|----------------------------------------------------------------|----------------------------------------------------------------------------------------------------------------------------------------------------------------------|
| <b>Starting cells</b>                      | MEFs                                                | Human adipose derived stem cells (hADSC)              | Human fibroblasts                                              | Human islets (1500 islet equivalents)                                                                                                                                |
| <b>Method used</b>                         | Exosome+small molecule; monolayer culture           | Small molecule; suspension culture                    | Small molecule; transient iPSC; monolayer + suspension culture | Transplanted in the kidney capsule of SCID mice                                                                                                                      |
| <b>C-peptide release (absolute amount)</b> | 145.4 pM (low glucose)<br><br>180 pM (high glucose) | 47.68 pM (low glucose)<br><br>80.61 pM (high glucose) | 60 pM (low glucose)<br><br>90 pM (high glucose)                | 1000 pM (0 minutes after intraperitoneal glucose tolerance test; low glucose)<br><br>1500 pM (60 minutes after intraperitoneal glucose tolerance test; high glucose) |

**Supplementary Figures**

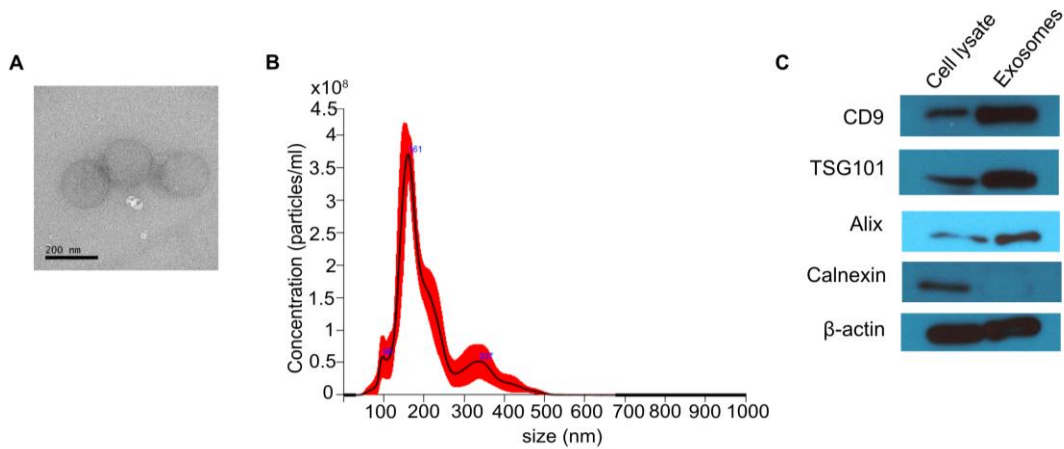

**Supplementary Figure 1.** Characterization of exosomes derived from the conditioned medium of the MIN6 insulinoma cell line. **(A)** Morphology and size of MIN6-derived exosomes as determined by TEM negative staining. Scale bar = 200 nm. **(B)** Particle size distribution of the MIN6-derived exosomes using NTA. **(C)** Western blot analysis of exosome-associated proteins—CD63, CD9, TSG101, and Alix. Calnexin is an endoplasmic reticulum protein.  $\beta$ -actin was used as a loading control. The data shown represent three (A and B), and two (C) independent experiments. TEM = transmission electron microscopy, NTA = nanoparticle tracking analysis. **The previous western blot image for ALIX has been replaced with a new image.**

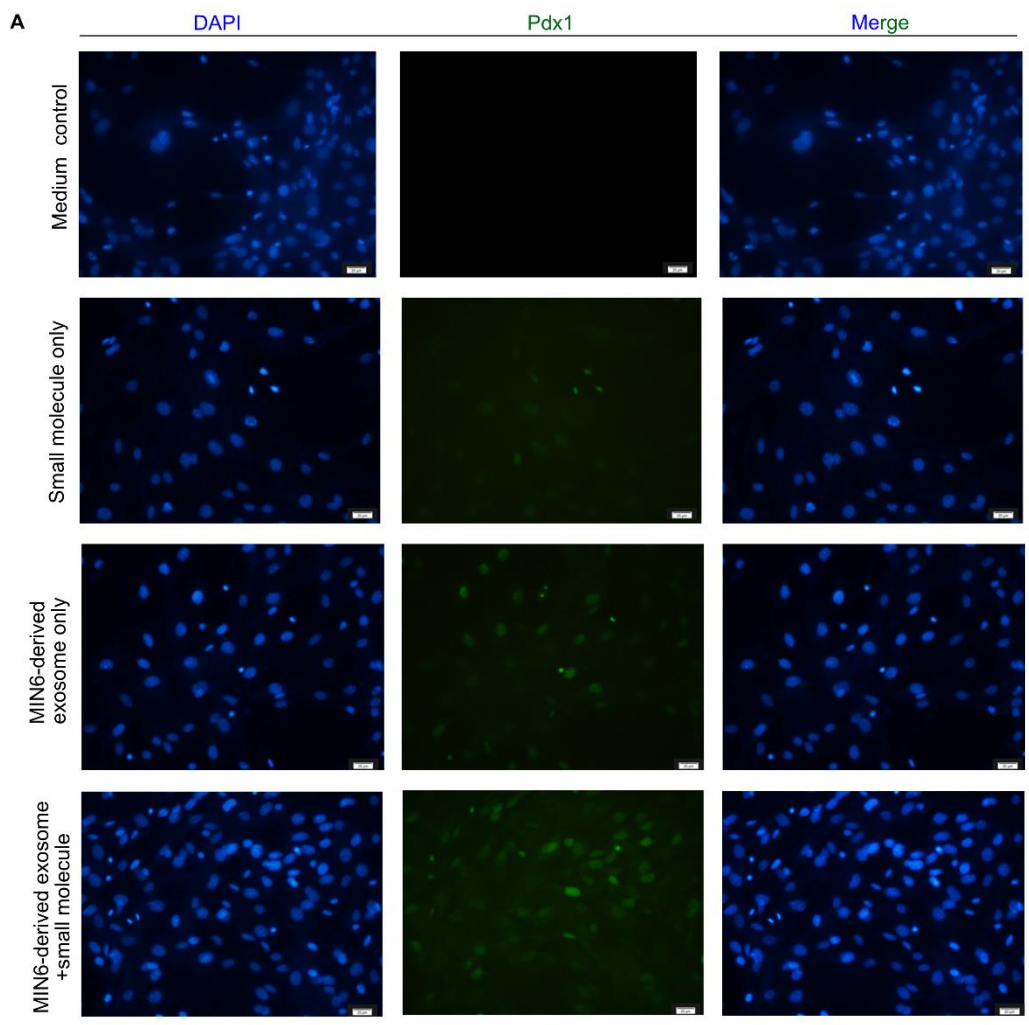

B

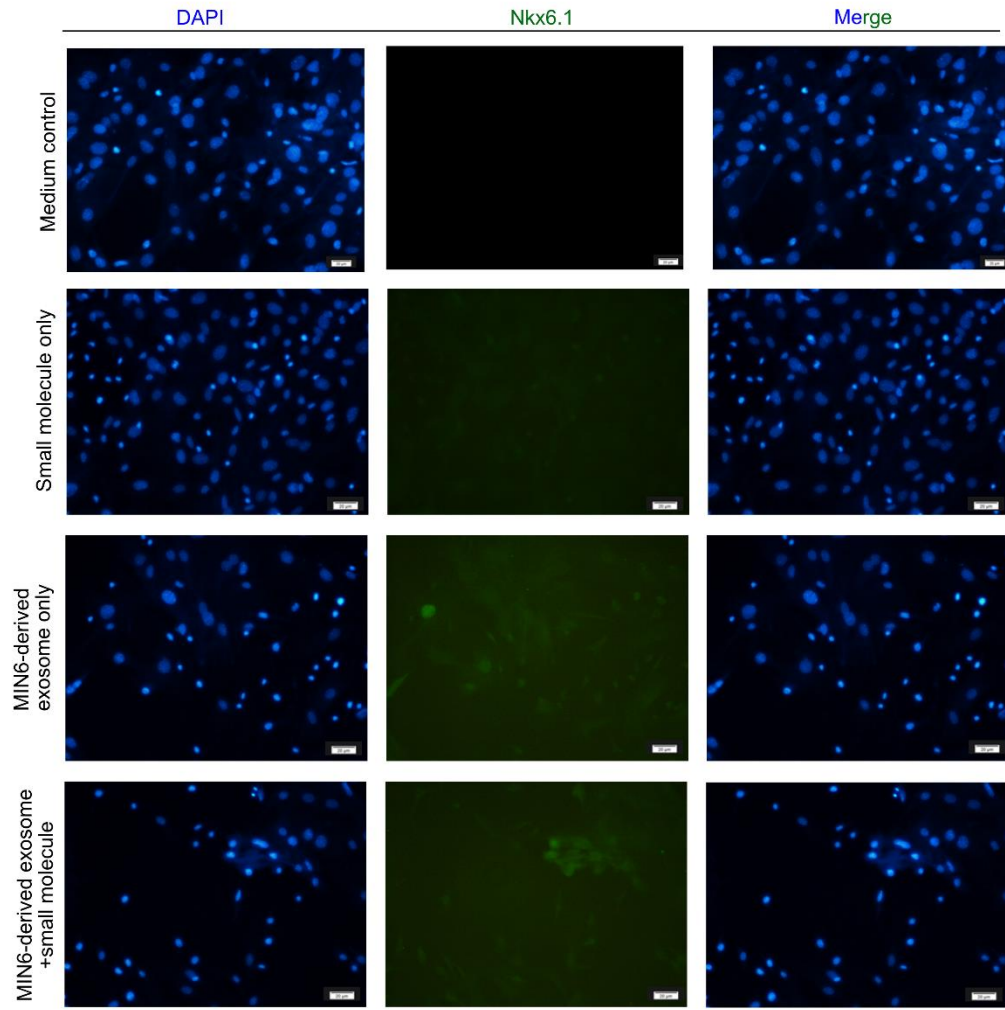

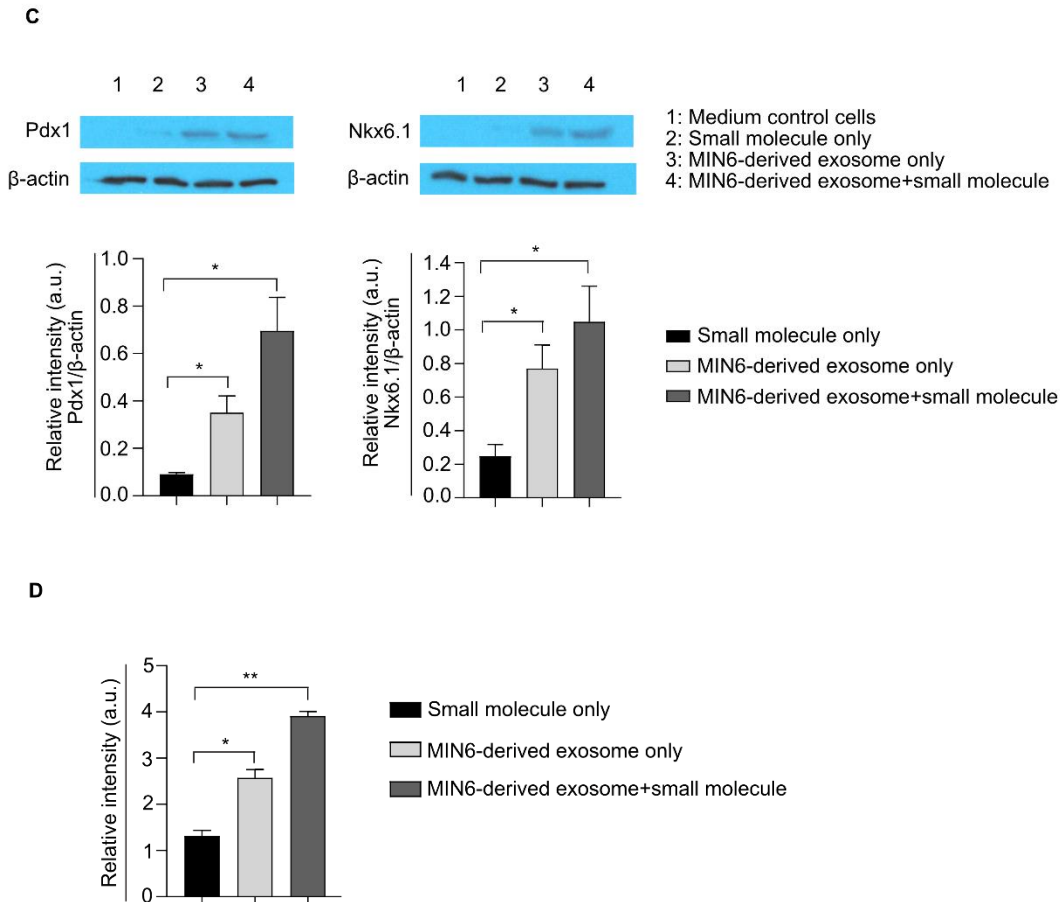

**Supplementary Figure 2.** Expression of the Pdx1 and Nkx6.1 protein in MEFs differentiated into  $\beta$ -like cells. (A) Pdx1 protein expression in MEFs differentiated into  $\beta$ -like cells under various conditions. Scale bar = 20  $\mu$ m. (B) Nkx6.1 protein level in MEFs differentiated into  $\beta$ -like cells. Scale bar = 20  $\mu$ m. (C) Western blot images for Pdx1 and Nkx6.1 protein present in cells grown under different conditions (Top). Densitometry analysis was performed to quantify the protein levels in different conditions (Bottom). As no Pdx1 and Nkx6.1 band was detected in medium control cells, they were not considered for the densitometry analysis. (D) Fluorescence intensity was measured using ImageJ software for the C-peptide positive cells grown under different conditions relative to medium control cells. a.u.= arbitrary units. \* $P < 0.05$ , and \*\* $P < 0.01$ . Statistical significance was determined by paired, two-tailed t-testing. The data shown represent the mean  $\pm$  SEM of two independent experiments.

A

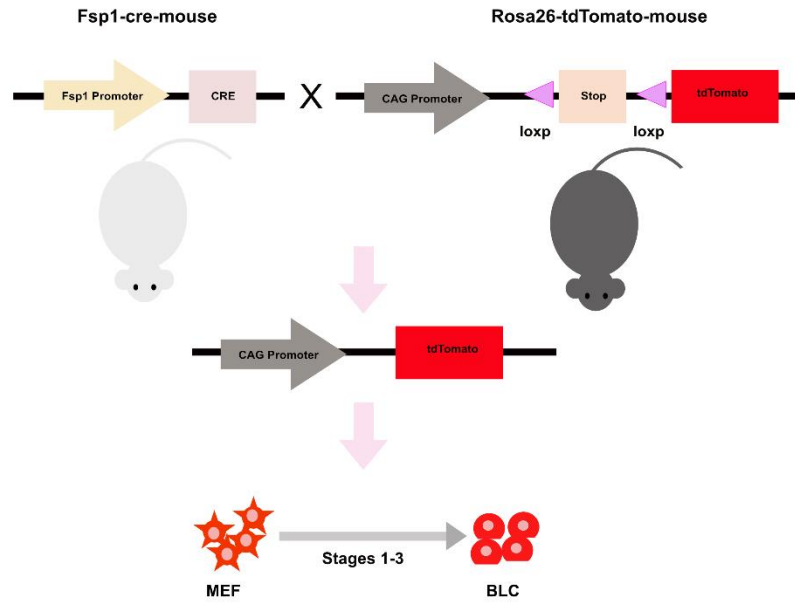

B

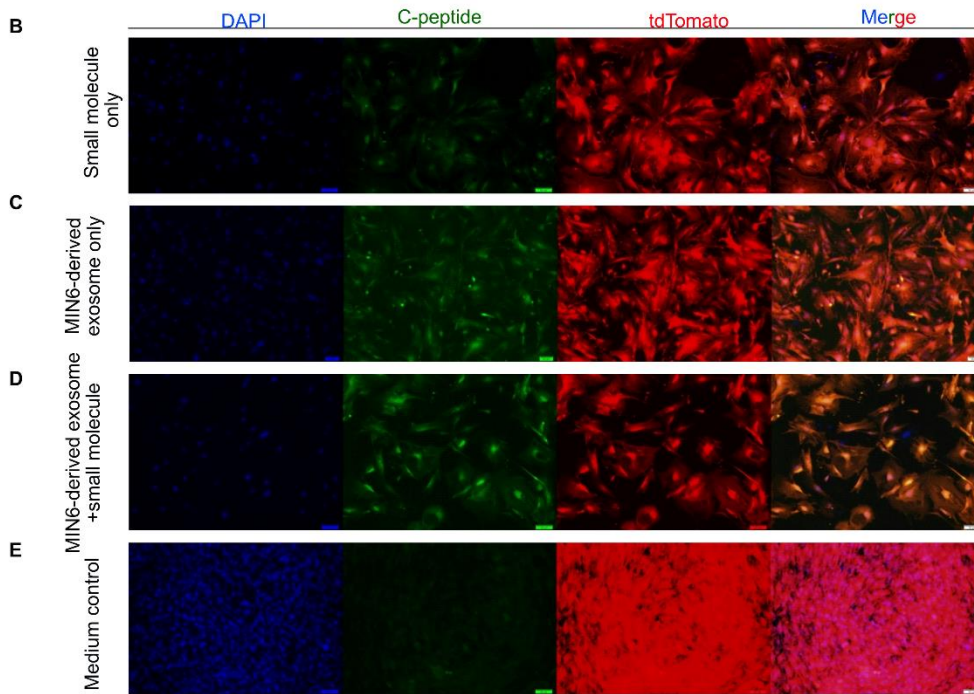



**Supplementary Figure 3.** tdTomato MEFs undergo differentiation to  $\beta$ -like cells. **(A)** Schematic diagram depicting the lineage tracing experiment. The tdTomato MEFs were differentiated into  $\beta$ -like cells using **(B)** small molecule only, **(C)** MIN6-derived exosome only, and **(D)** MIN6-derived exosome + small molecule methods. **(E)** Medium control cells. Scale bar = 50  $\mu$ m. The first panel represents DAPI (nucleus) stained cells; the second panel represents C-peptide stained cells; the third panel depicts tdTomato positive cells, and the last panel shows the co-expression of C-peptide with tdTomato (merged image), indicating the fibroblastic origin of the differentiated  $\beta$ -like cells. The data shown represent two independent experiments. MEF = mouse embryonic fibroblast, and BLC =  $\beta$ -like cells.

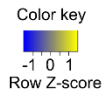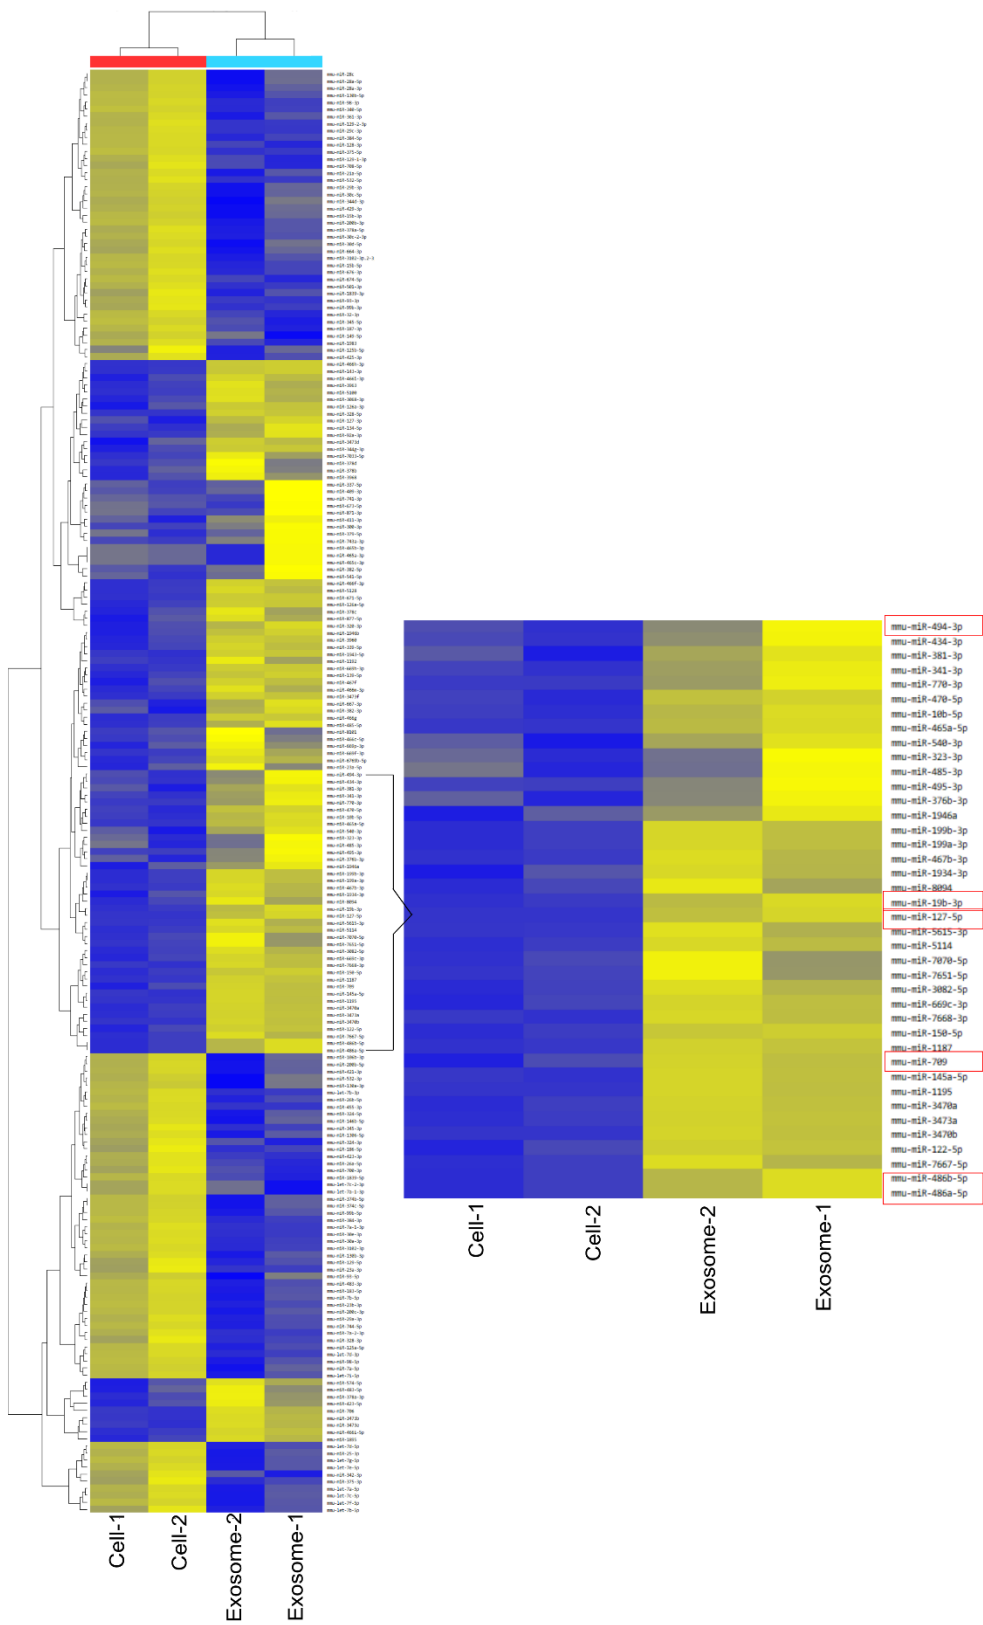

**Supplementary Figure 4. Heatmap of differential miRNA expression profiles.** The miRNAs derived from miRNA-sequencing of MIN6 cells and their exosomes were clustered using one-way hierarchical clustering (Euclidean method, complete Linkage) and the Z-score for the normalized value (log<sub>2</sub> based). Yellow indicates upregulation, and blue represents downregulation of miRNA expression. The region representing the miRNAs subsequently validated in our study has been enlarged, and the miRNAs are marked with red boxes.

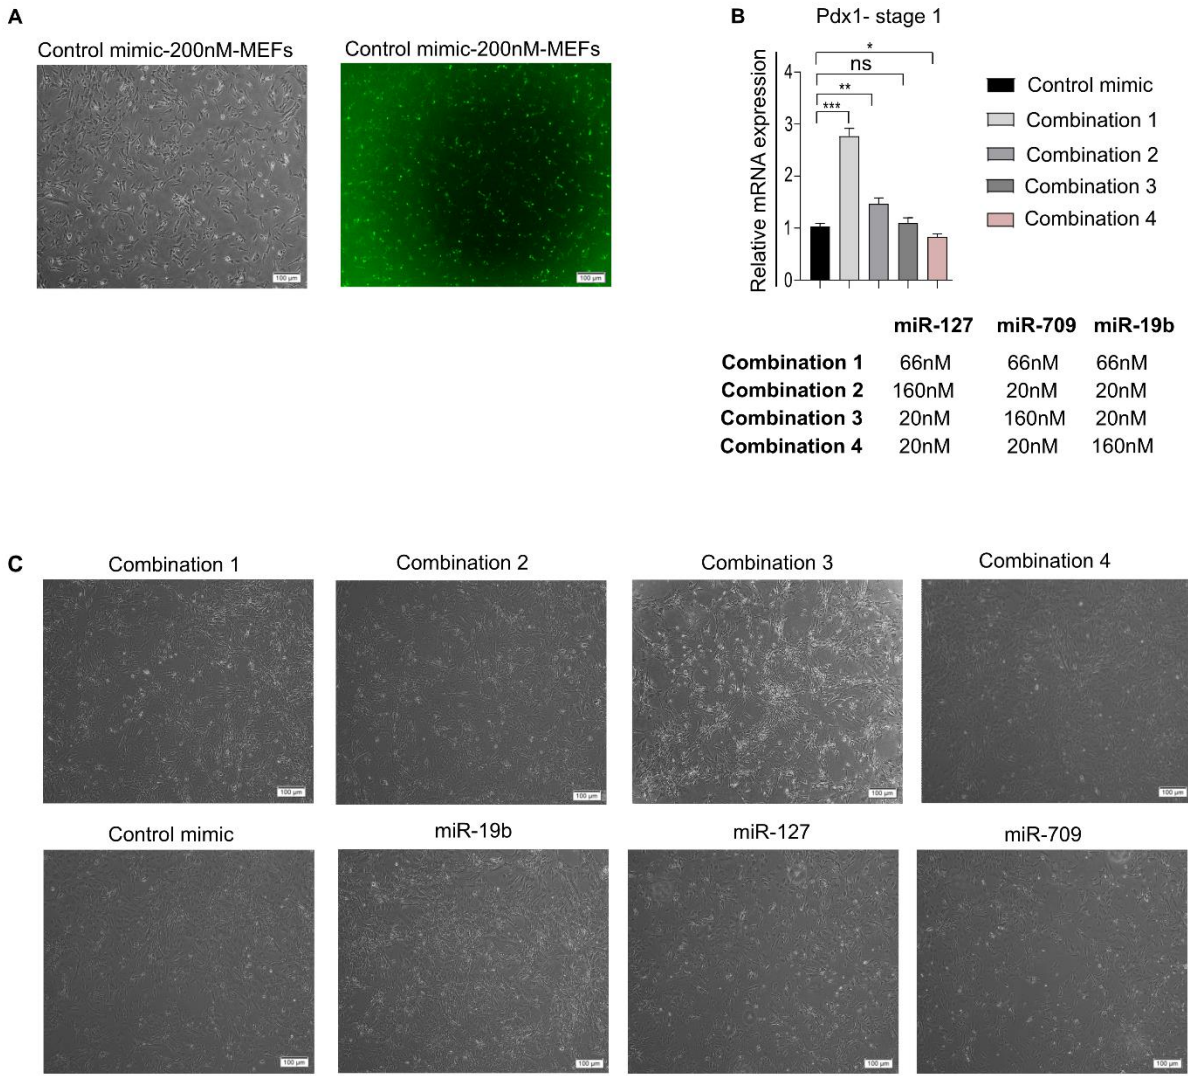

**Supplementary Figure 5. Transfection of miRNA mimics and their combinations.** (A) Transfection of 5' FAM labeled control mimic to optimize transfection efficiency in MEFs; the first panel is a bright field image of the MEFs 48 hours after transfection in stage 1 medium, and the second panel is the corresponding green channel (fluorescence microscope) image. Scale bar = 100  $\mu$ m. (B) Pdx1 transcript induction using different combinations of miR-127, miR-709, and miR-19b in stage 1 medium, as determined by a qRT-PCR analysis (upper panel). \* $P < 0.05$ , \*\* $P < 0.01$ , and \*\*\* $P < 0.001$ . Statistical significance was determined by paired, two-tailed t-testing. The data shown represent the mean  $\pm$  SEM of three independent experiments. (C) Bright field microscopic images depicting morphological changes in MEFs upon treatment with different combinations (upper panel) in stage 1 of differentiation (after 48 hours). The combinations were made using different ratios of the three miRNAs. Individual transfections (lower panel) of miR-127, miR-709, and miR-19b were used as references to assess the proliferative ability of stage 1 MEFs treated with various combinations. Scale bar = 100  $\mu$ m. ns = non-significant.

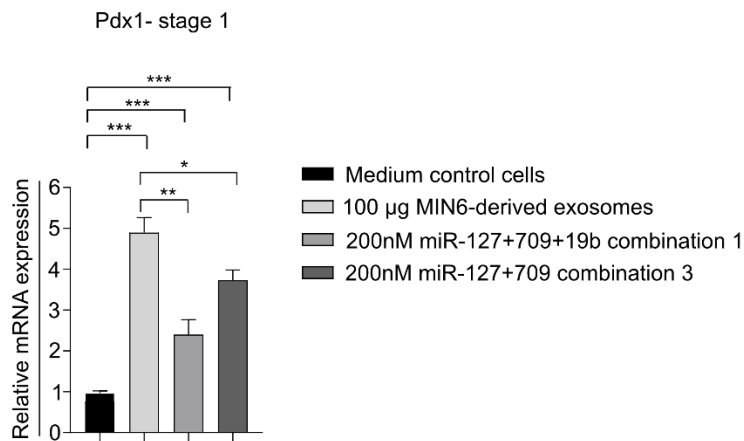

**Supplementary Figure 6. Pdx1 expression induced by MIN6-derived exosome and different miRNA combinations.** MIN6-derived exosomes (100  $\mu$ g; saturating exosome amount), miR-127+709+19b combination 1, and miR-127+709 combination 3 were used to treat MEFs in stage 1 for measuring induction of Pdx1 expression compared to medium control cells. \* $P < 0.05$ , \*\* $P < 0.01$ , and \*\*\* $P < 0.001$ . Statistical

significance was determined by paired, two-tailed t-testing. The data shown represent the mean  $\pm$  SEM of two independent experiments.

### **Supplemental References:**

- [1] Jeon, K.; Lim, H.; Kim, J.-H.; Thuan, N.V.; Park, S.H.; Lim, Y.-M.; Choi, H.-Y.; Lee, E.-R.; Kim, J.-H.; Lee, M.-S.; et al. Differentiation and Transplantation of Functional Pancreatic Beta Cells Generated from Induced Pluripotent Stem Cells Derived from a Type 1 Diabetes Mouse Model. *Stem Cells and Development* 2012, 21, 2642–2655, doi:10.1089/scd.2011.0665
- [2] Chandravanshi, B.; Bhonde, R. Reprogramming mouse embryo fibroblasts to functional islets without genetic manipulation. *J Cell Physiol* 2018, 233, 1627–1637, doi:10.1002/jcp.26068
- [3] Chandra, V.; G, S.; Muthyala, S.; Jaiswal, A.K.; Bellare, J.R.; Nair, P.D.; Bhonde, R.R. Islet-Like Cell Aggregates Generated from Human Adipose Tissue Derived Stem Cells Ameliorate Experimental Diabetes in Mice. *PLoS ONE* 2011, 6, e20615, doi:10.1371/journal.pone.0020615
- [4] Zhu, S.; Russ, H.A.; Wang, X.; Zhang, M.; Ma, T.; Xu, T.; Tang, S.; Hebrok, M.; Ding, S. Human pancreatic beta-like cells converted from fibroblasts. *Nature Communications* 2016, 7, 10080, doi:10.1038/ncomms10080
- [5] Lima, M.J.; Docherty, H.M.; Chen, Y.; Vallier, L.; Docherty, K. Pancreatic Transcription Factors Containing Protein Transduction Domains Drive Mouse Embryonic Stem Cells towards Endocrine Pancreas. *PLoS ONE* 2012, 7, e36481, doi:10.1371/journal.pone.0036481.
